# Supplementary material for: Revisiting the Contrasting Response of Polar Stratosphere to the Eastern and Central Pacific El Niños
Source: MDPI journal article supplement (doi:10.3390/atmos13050682), 2022-04-24
Supplement: s1 [file s1]

Archive with 1 entries (1 files):
- atmosphere-1620959-supplementary.pdf
